# Supplementary material for: Outer membrane vesicles containing OmpA induce mitochondrial fragmentation to promote pathogenesis of Acinetobacter baumannii
Source: Springer Nature journal article supplement (doi:10.1038/s41598-020-79966-9), 2021-01-12
Supplement: MOESM2 [file 41598_2020_79966_MOESM2_ESM.pdf]

# **Outer membrane vesicles containing OmpA induce mitochondrial fragmentation to promote pathogenesis of *Acinetobacter baumannii***

**Varnesh Tiku<sup>1</sup>, Eric M. Kofoed<sup>1</sup>, Donghong Yan<sup>2</sup>, Jing Kang<sup>2</sup>, Min Xu<sup>2</sup>, Mike Reichelt<sup>3</sup>, Ivan Dikic<sup>1,4,5,6\*</sup> and Man-Wah Tan<sup>1\*</sup>**

<sup>1</sup> Department of Infectious Diseases, Genentech Inc., 1 DNA Way, South San Francisco, CA 94080, USA

<sup>2</sup> Department of Translational Immunology, Genentech Inc., 1 DNA Way, South San Francisco, CA 94080, USA

<sup>3</sup> Department of Pathology, Genentech Inc., 1 DNA Way, South San Francisco, CA 94080, USA

<sup>4</sup> Institute of Biochemistry II, Faculty of Medicine, Goethe University Frankfurt, Theodor-Stern- Kai 7, 60590 Frankfurt am Main, Germany

<sup>5</sup> Buchmann Institute for Molecular Life Sciences, Goethe University Frankfurt, Max-von-Laue-Str. 15, 60438 Frankfurt am Main, Germany

<sup>6</sup> Max Planck Institute of Biophysics, Max-von-Laue-Str. 3, 60438 Frankfurt am Main, Germany

\* Corresponding authors (tan.man-wah@gene.com and dikic@biochem2.uni-frankfurt.de)

## **Supplementary Material**

**(Supplementary Figures 1 – 5; Supplementary Table 1)**

# Supplementary Figure 1

**A**

Genetic Recombineering in *A. baumannii*

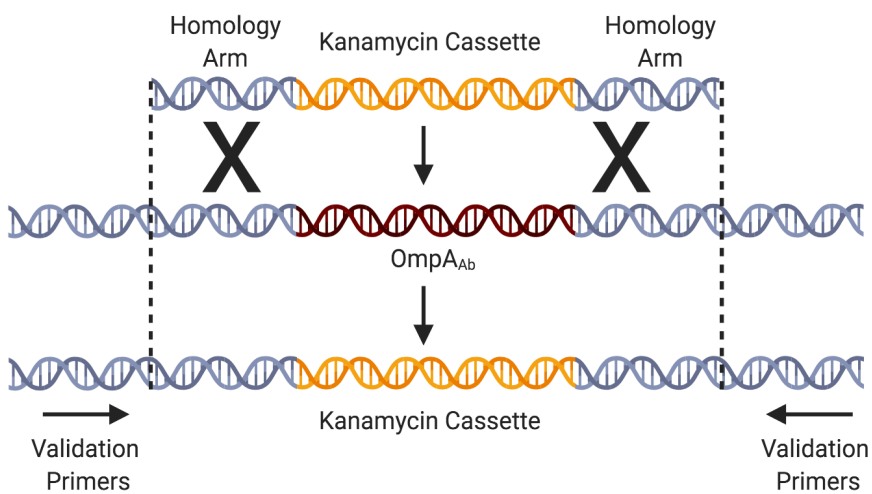

**B**

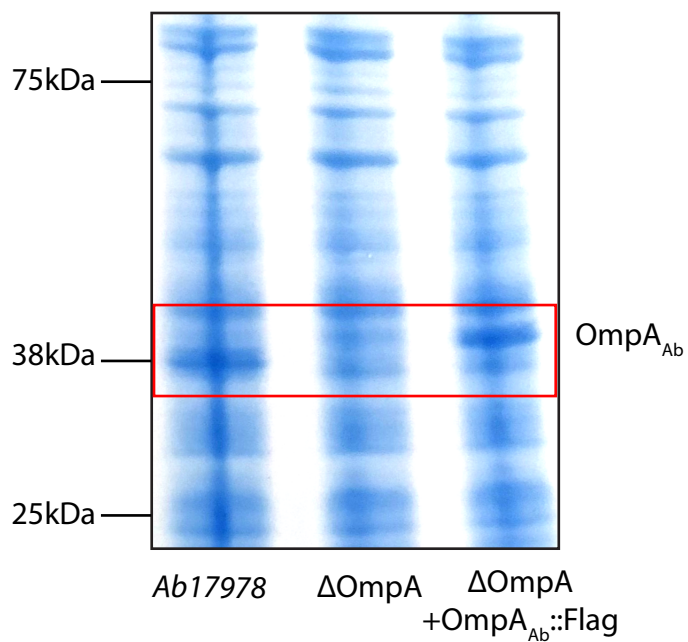

**C**

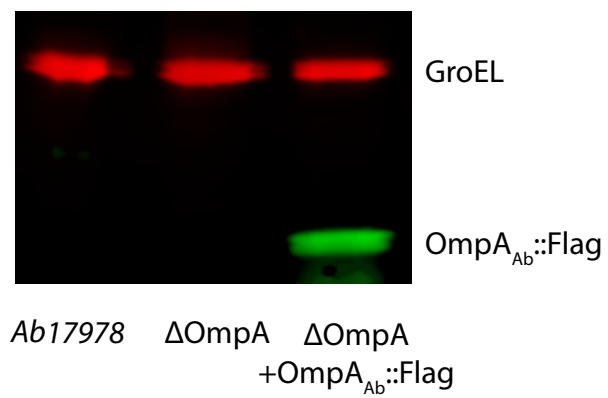

# Supplementary Figure 2

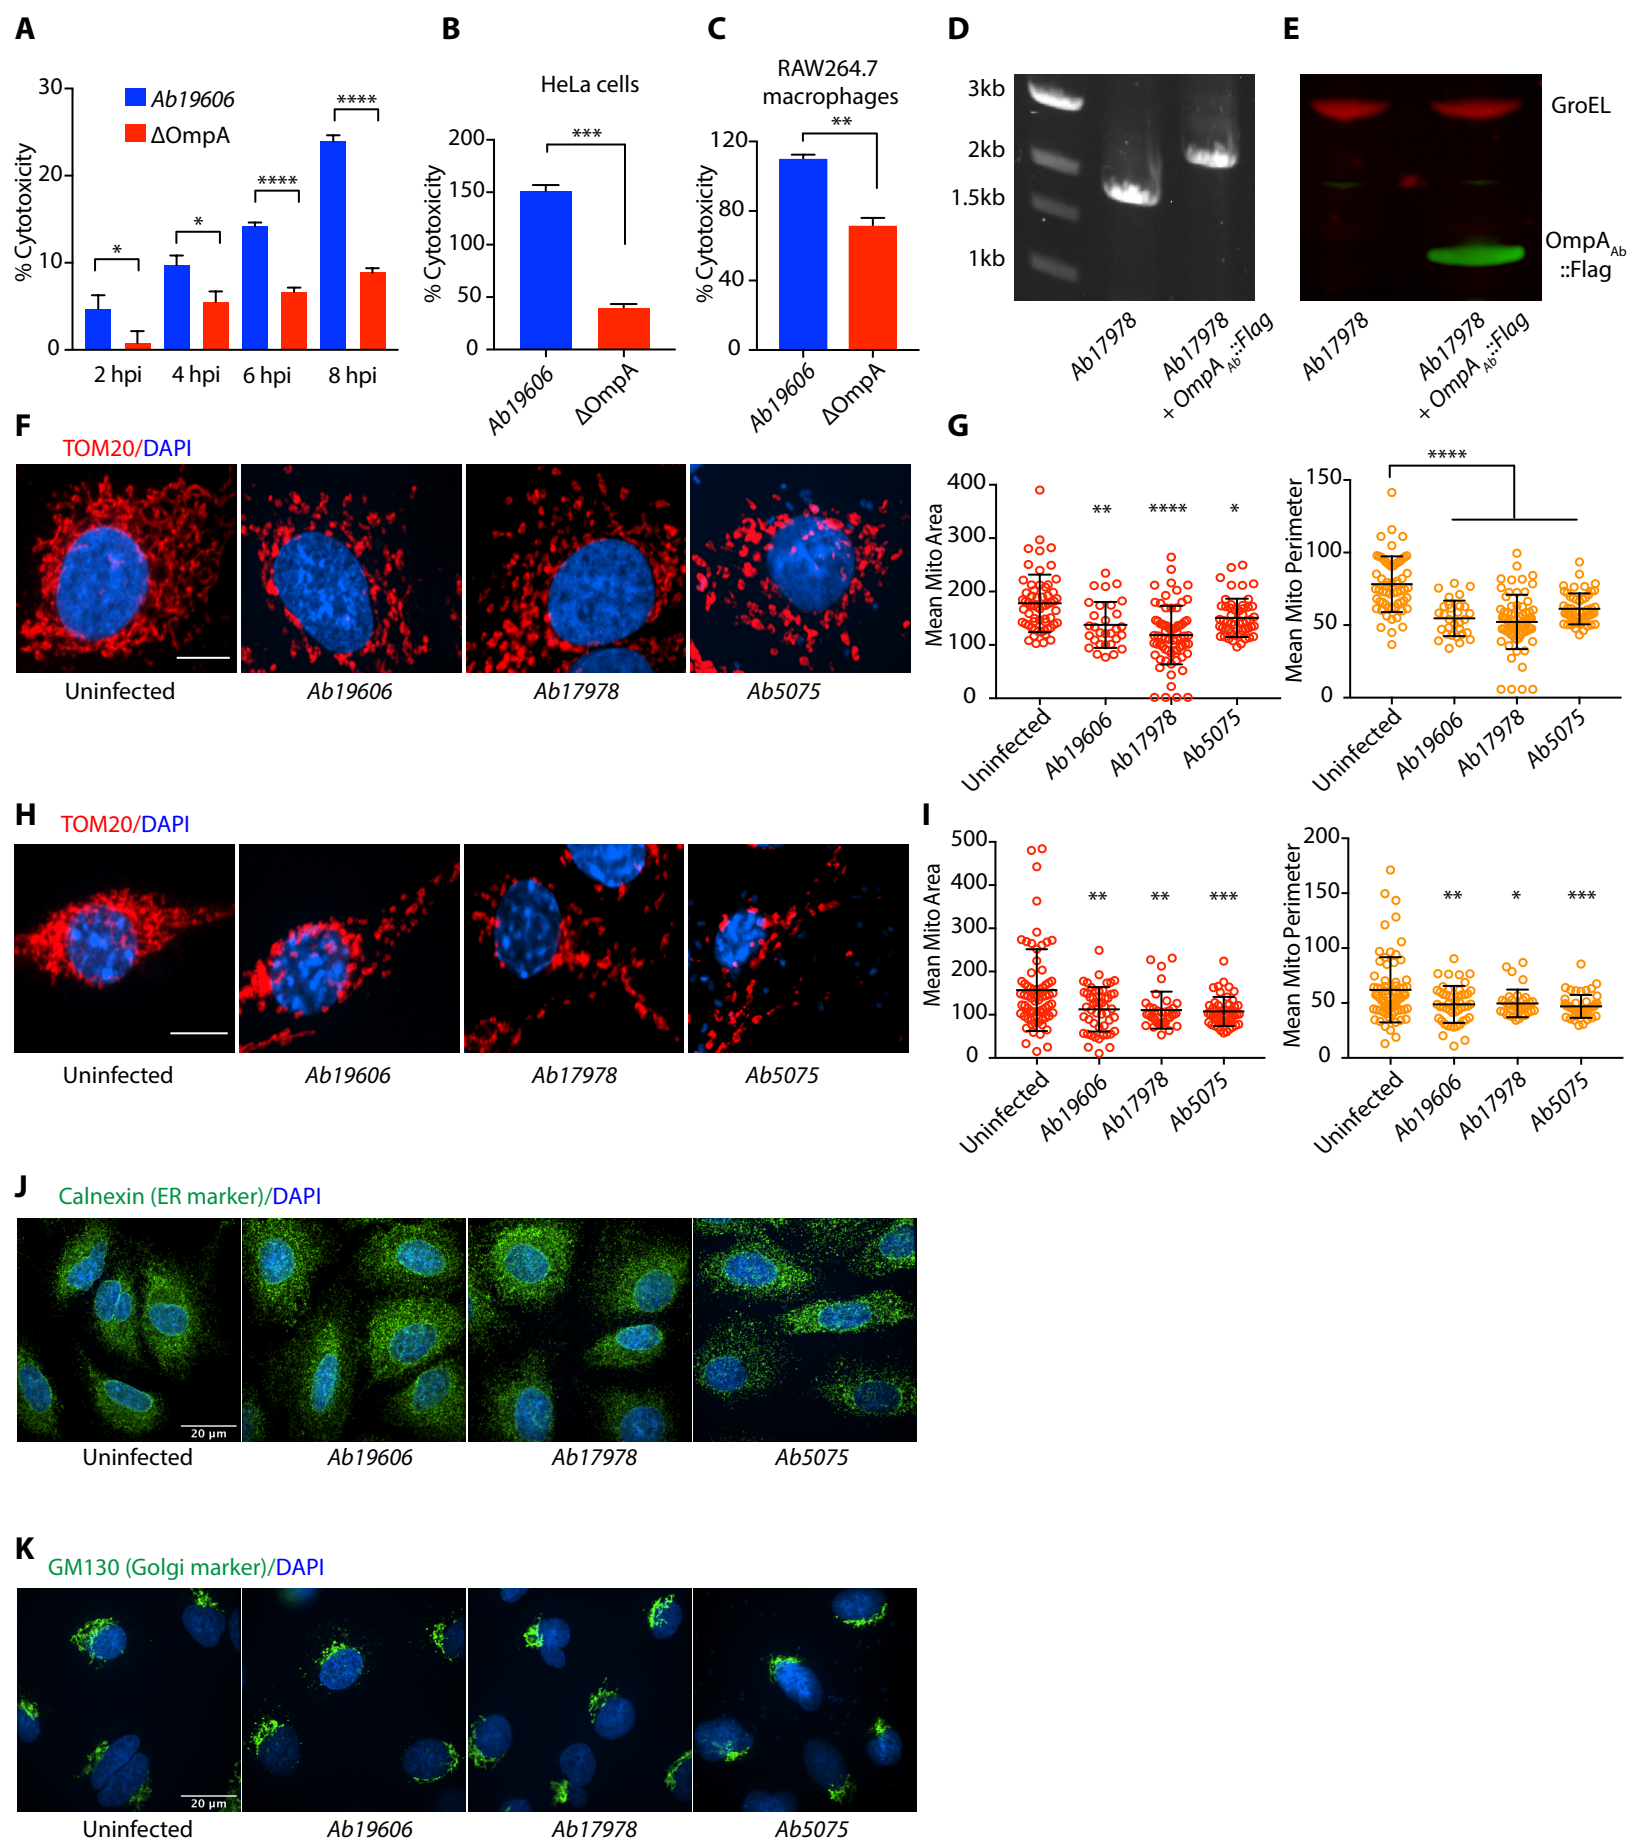

Supplementary Figure 3

**A**

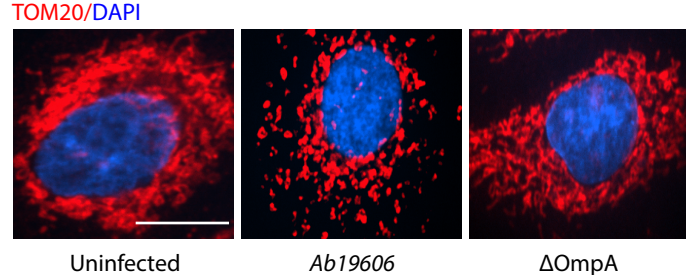

**B**

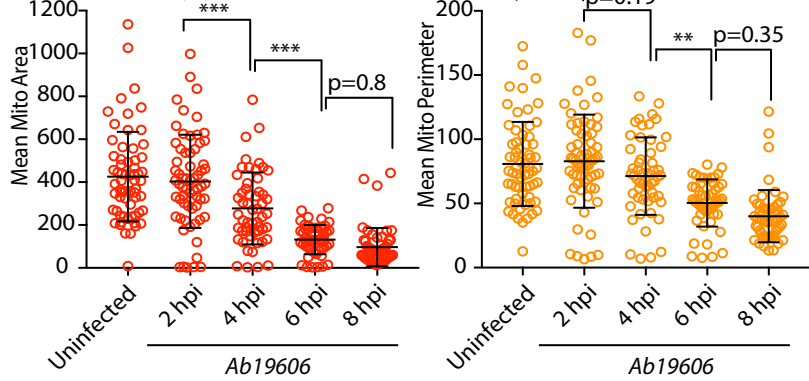

**C**

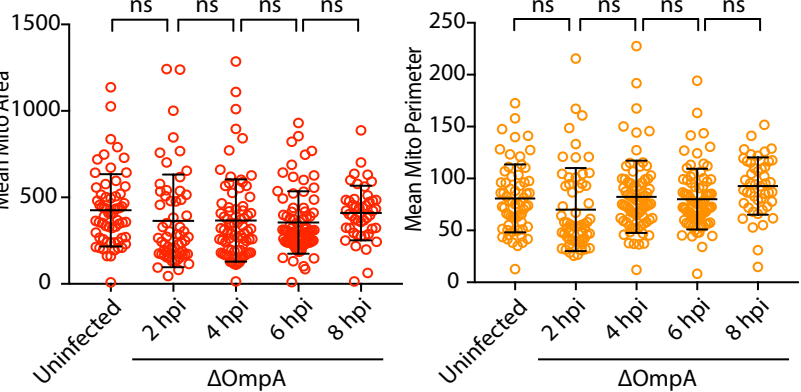

**D**

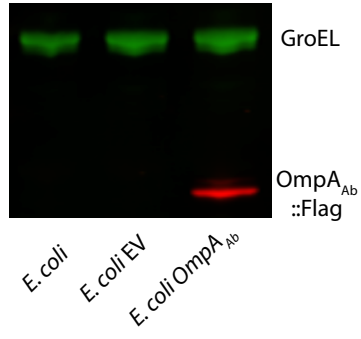

**E**

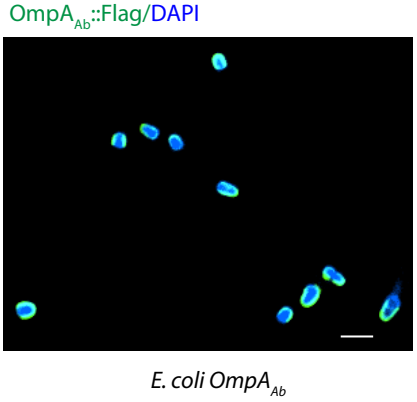

Supplementary Figure 4

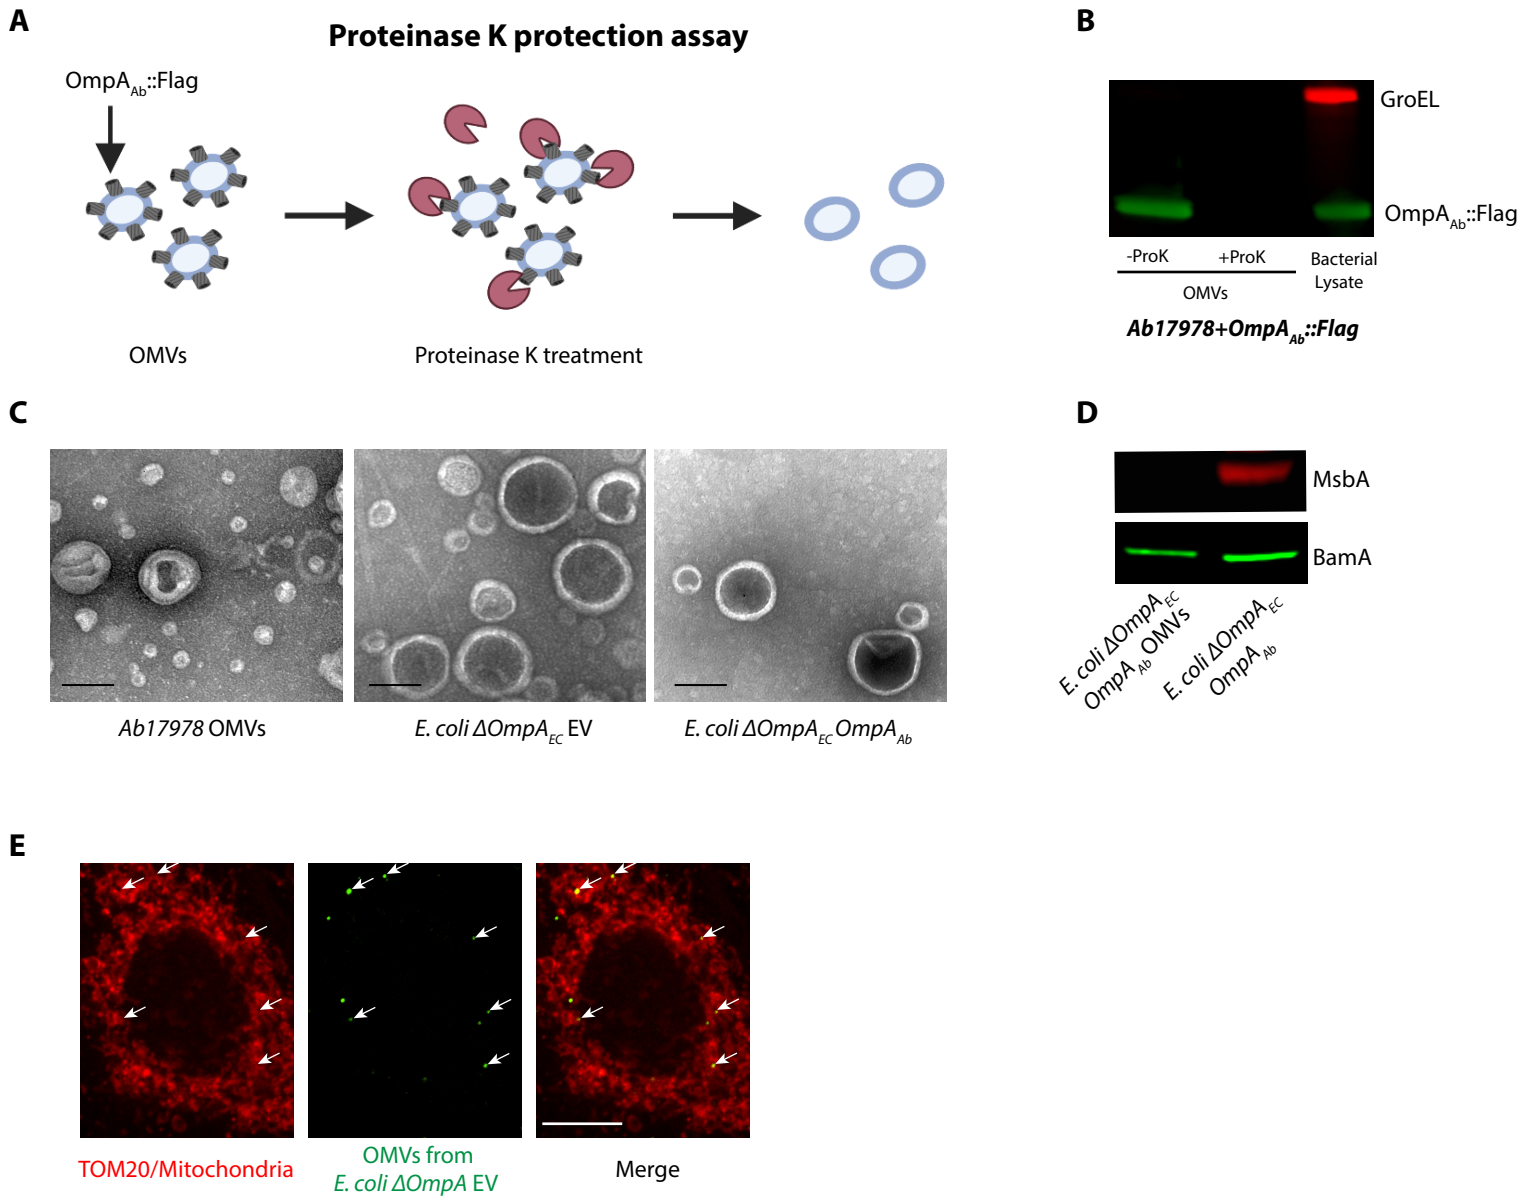

# Supplementary Figure 5

**A** Uncropped Western Blot from Fig 2C

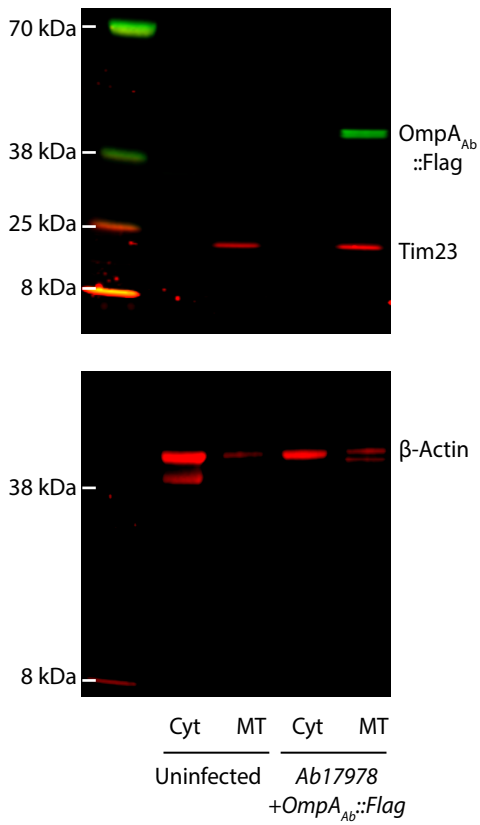

**F** Uncropped Western Blot from Sup. Fig 2E

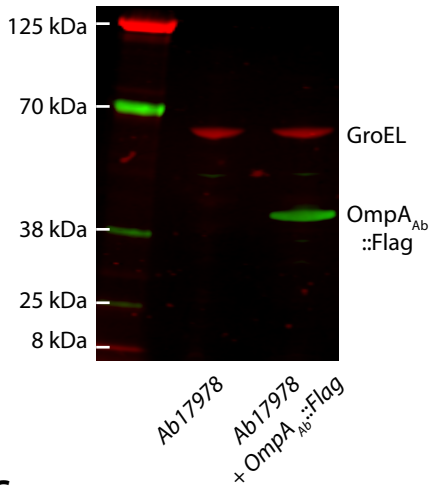

**G** Uncropped Western Blot from Sup. Fig 3D

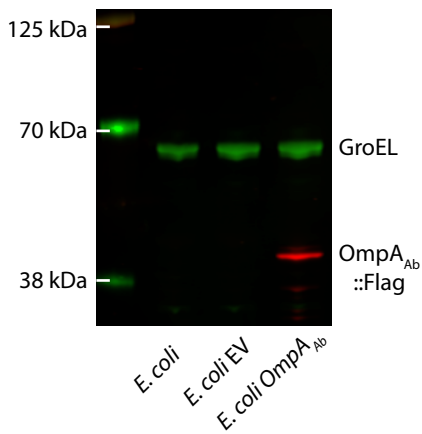

**B** Uncropped Western Blot from Fig 3C

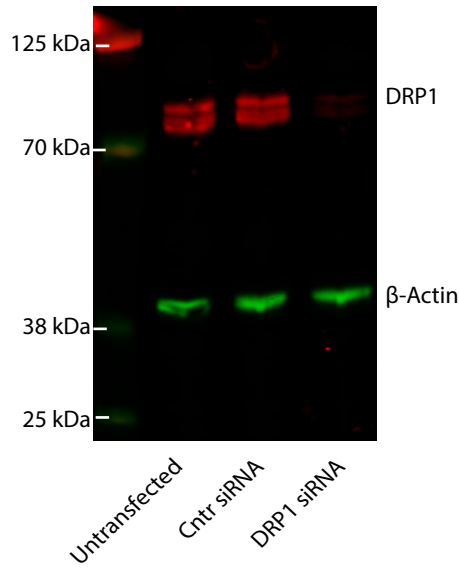

**D** Uncropped Western Blot from Fig 5G

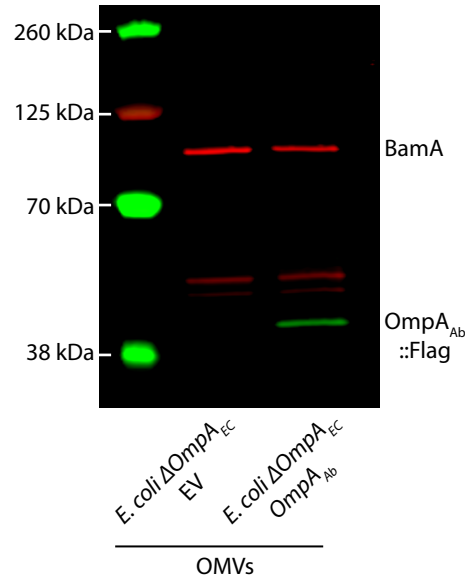

**H** Uncropped Western Blot from Sup. Fig 4B

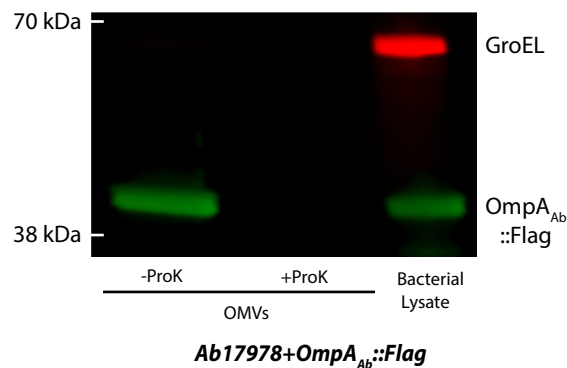

**C** Uncropped Western Blot from Fig 5D

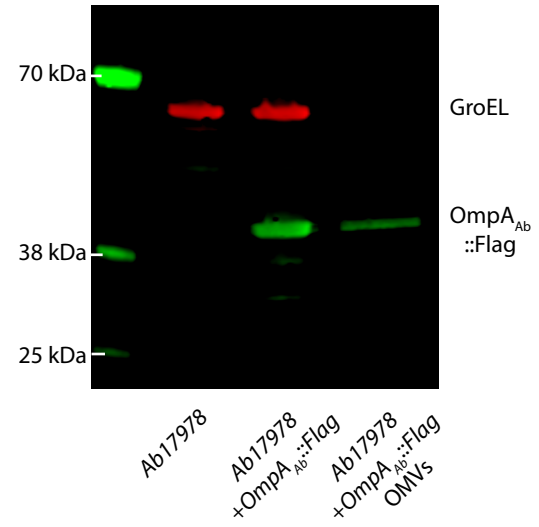

**E** Uncropped Western Blot from Sup. Fig 1C

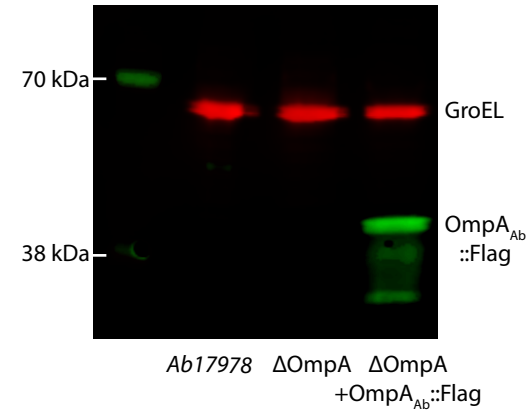

**I** Uncropped Western Blot from Sup. Fig 4D

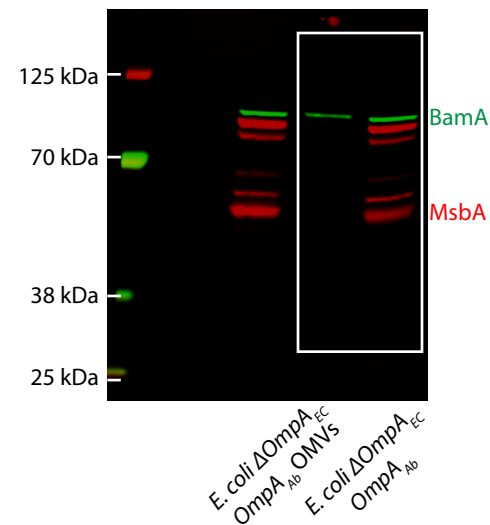

## Supplementary Table 1: Bacterial strains used in the study

| Bacterial species/strains                                     | Genotype/Other information                                            | Study Designation                                               |
|---------------------------------------------------------------|-----------------------------------------------------------------------|-----------------------------------------------------------------|
| <i>A. baumannii</i> Ab17978                                   | Wildtype Ab17978                                                      | Wildtype or WT Ab17978                                          |
| <i>A. baumannii</i> Ab17978 $\Delta$ OmpA                     | $\Delta$ OmpA                                                         | $\Delta$ OmpA                                                   |
| <i>A. baumannii</i> Ab17978 $\Delta$ OmpA complemented strain | $\Delta$ OmpA+OmpA <sub>Ab</sub> ::Flag (Integrated in the genome)    | $\Delta$ OmpA+OmpA <sub>Ab</sub> ::Flag                         |
| <i>A. baumannii</i> Ab19606                                   | Wildtype Ab19606                                                      | Wildtype or WT Ab19606                                          |
| <i>A. baumannii</i> Ab19606 $\Delta$ OmpA                     | $\Delta$ OmpA                                                         | $\Delta$ OmpA                                                   |
| <i>A. baumannii</i> Ab5075 clinical isolate                   | Wildtype Ab5075                                                       | Ab5075                                                          |
| <i>A. baumannii</i> Ab17978                                   | Wildtype Ab17978+OmpA <sub>Ab</sub> ::Flag (Integrated in the genome) | Ab17978+OmpA <sub>Ab</sub> ::Flag                               |
| <i>E. coli</i> BW25113                                        | Wildtype <i>E. coli</i>                                               | <i>E. coli</i>                                                  |
| <i>E. coli</i> BW25113                                        | <i>E. coli</i> BW25113 + empty vector pWH1266                         | <i>E. coli</i> EV                                               |
| <i>E. coli</i> BW25113 $\Delta$ OmpA                          | <i>E. coli</i> BW25113 $\Delta$ OmpA + empty vector pWH1266           | <i>E. coli</i> $\Delta$ OmpA <sub>EC</sub> EV                   |
| <i>E. coli</i> BW25113                                        | <i>E. coli</i> BW25113 + OmpA <sub>Ab</sub> in pWH1266                | <i>E. coli</i> OmpA <sub>Ab</sub>                               |
| <i>E. coli</i> BW25113 $\Delta$ OmpA                          | <i>E. coli</i> BW25113 $\Delta$ OmpA + OmpA <sub>Ab</sub> in pWH1266  | <i>E. coli</i> $\Delta$ OmpA <sub>EC</sub> , OmpA <sub>Ab</sub> |
| <i>S. aureus</i> USA300                                       | Wildtype <i>S. aureus</i> USA300                                      | <i>S. aureus</i>                                                |
